# Supplementary material
Source: publisher figshare collection journal article supplement (https://acs.figshare.com/ndownloader/files/11144558)
Supplement: Supplementary file 1 [file 11144558]

## Supporting Information:

Analysis and Identification of 2'-Deoxyadenosine-derived Adducts in Lung and Liver DNA of F-344 Rats Treated with the Tobacco-Specific Carcinogen 4-(Methylnitrosamino)-1-(3-pyridyl)-1-butanone and Enantiomers of its Metabolite 4-(Methylnitrosamino)-1-(3-pyridyl)-1-butanol

*Erik S. Carlson<sup>1,2</sup>, Pramod Upadhyaya<sup>1</sup>, Peter W. Villalta<sup>1</sup>, Bin Ma<sup>1</sup>, and Stephen S. Hecht<sup>1\*</sup>*

<sup>1</sup> Masonic Cancer Center, University of Minnesota, 2231 6<sup>th</sup> Street SE, 2-210 CCRB, Minneapolis, MN 55455, USA

<sup>2</sup> Department of Pharmacology, University of Minnesota Medical School, 321 Church Street SE, 6-120 Jackson Hall, Minneapolis, MN 55455, USA

\*To whom correspondence should be addressed  
Stephen S. Hecht  
Masonic Cancer Center, University of Minnesota  
2231 6<sup>th</sup> Street SE  
2-148 CCRB  
Minneapolis, MN 55455, USA.

Phone: (612)-624-7604  
Fax: (612)-624-3869  
E-mail: hecht002@umn.edu

## Table of Contents:

|                 |        |
|-----------------|--------|
| Figure S1 ..... | Pg. S2 |
| Figure S2 ..... | Pg. S3 |

**Figure S1:** Representative chromatograms obtained from the LC-NSI-HRMS/MS analyses of POB- and PHB-DNA adducts in the lungs of rats chronically treated with 5 ppm NNK for 50 weeks. Each channel is monitoring the two most abundant product ions from MS<sup>2</sup>-fragmentation of a particular DNA adduct. Adduct identity and product ions are the following: A) *N*<sup>1</sup>-POB-dIno (400 → 283.1300, 265.1194), (B) *N*<sup>1</sup>-PHB-dIno (402 → 286.1296, 268.1191), (C) *N*<sup>6</sup>-POB-dAdo (399 → 283.1300, 265.1194), (D) [D<sub>4</sub>]*N*<sup>6</sup>-POB-dAdo (403 → 285.1456, 267.1350), (E) *N*<sup>6</sup>-PHB-dAdo (401 → 287.1550, 269.1445), (F) [<sup>15</sup>N<sub>5</sub>]*N*<sup>6</sup>-PHB-dAdo (406 → 290.1307, 272.1202).

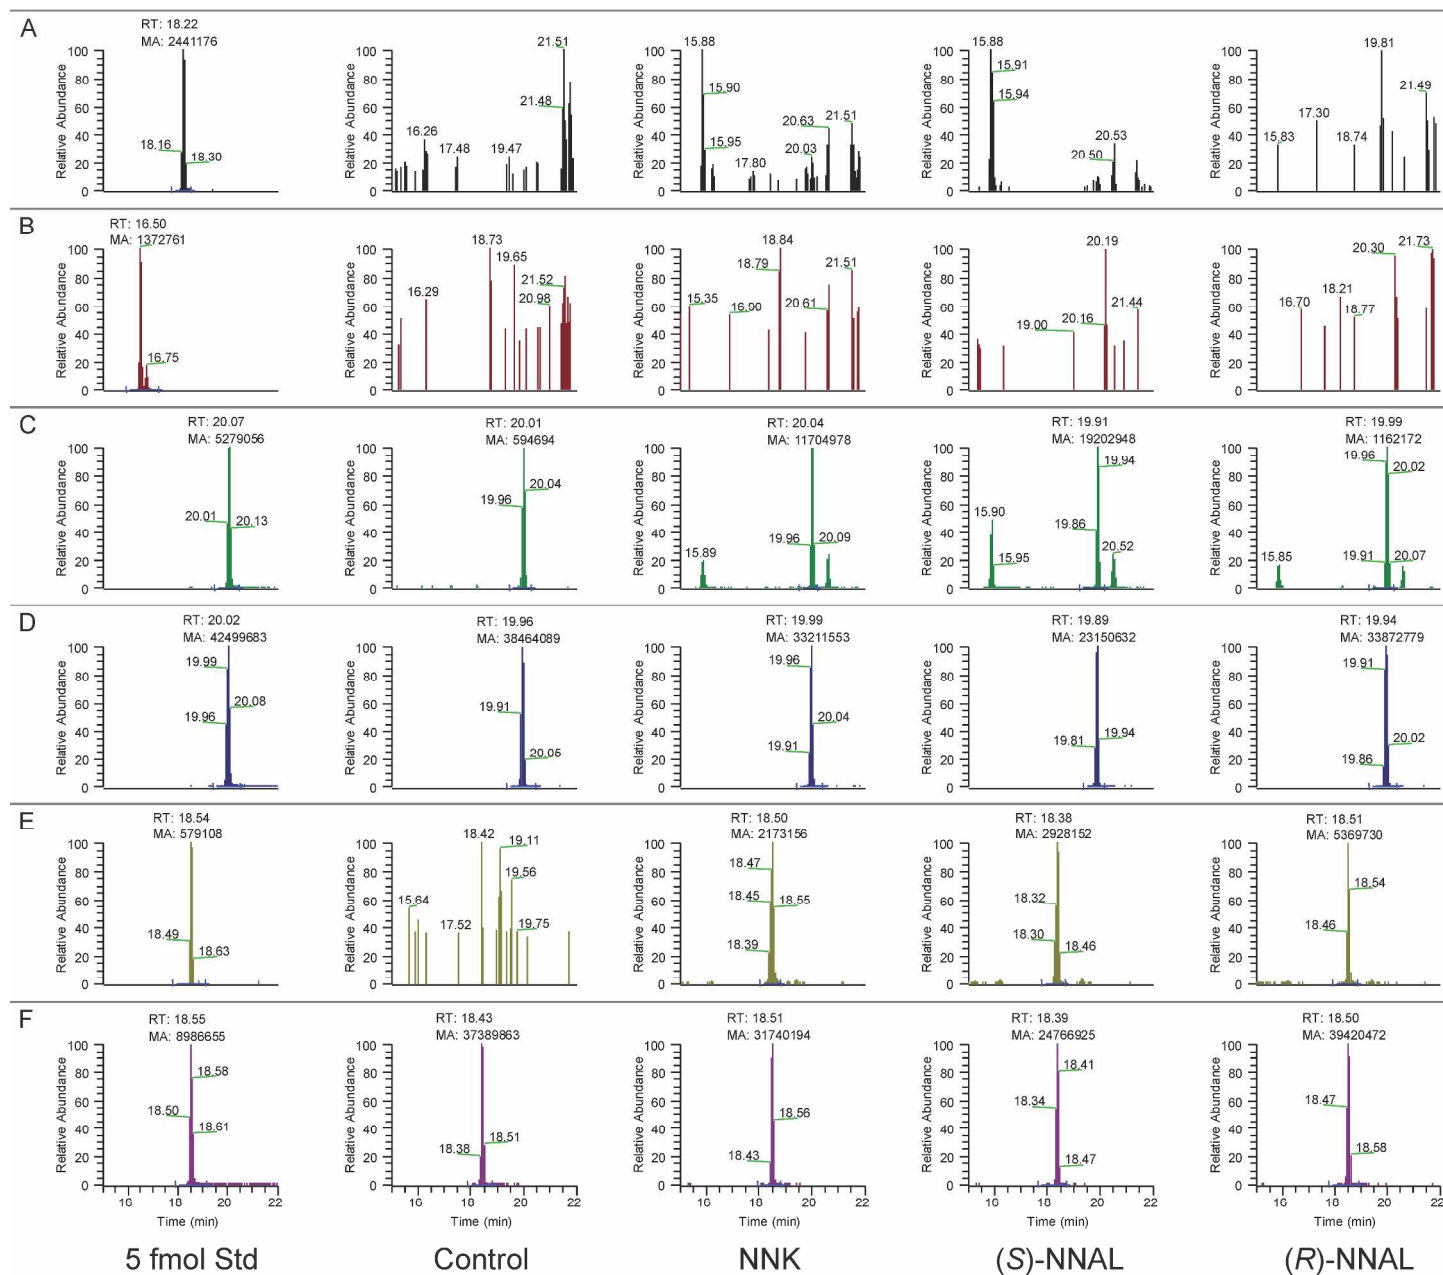

**Figure S2:** Structures and fragmentation patterns for the monitored *N*<sup>6</sup>-dAdo and *N*<sup>1</sup>-dIno adducts. dR: 2'-deoxyribose.

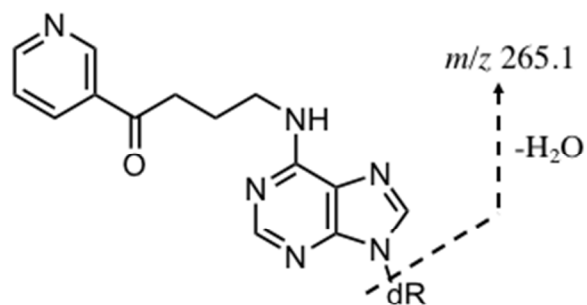

*N*<sup>6</sup>-POB-dAdo  
[M+H] = *m/z* 399.1

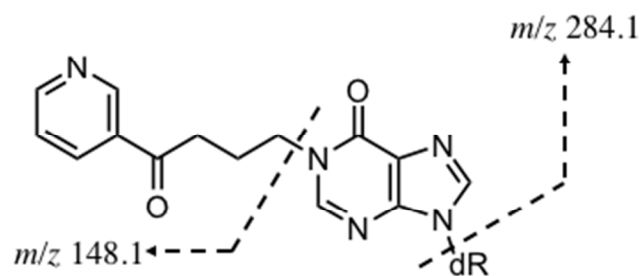

*N*<sup>1</sup>-POB-dIno  
[M+H] = *m/z* 400.1

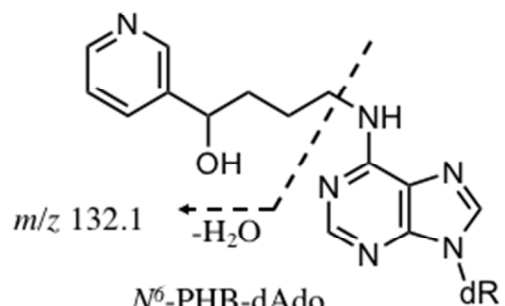

*N*<sup>6</sup>-PHB-dAdo  
[M+H] = *m/z* 401.1

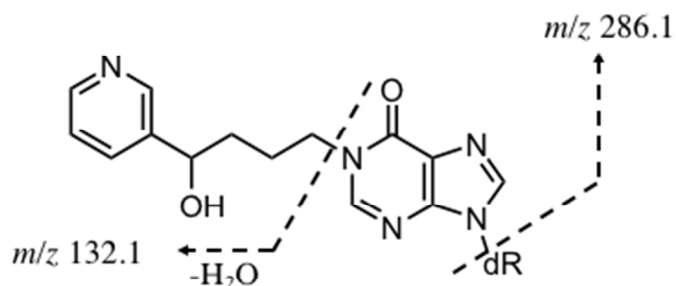

*N*<sup>1</sup>-PHB-dIno  
[M+H] = *m/z* 402.1

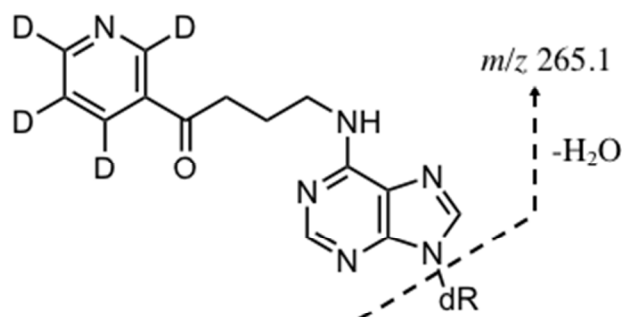

[Pyridine-D<sub>4</sub>]*N*<sup>6</sup>-POB-dAdo  
[M+H] = *m/z* 403.1

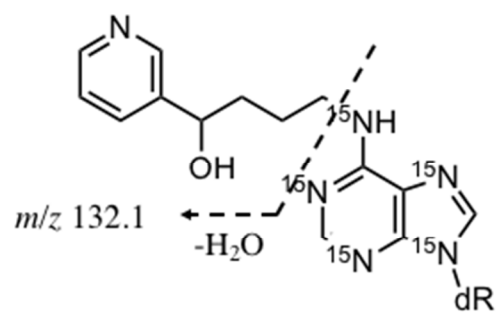

[<sup>15</sup>N<sub>5</sub>]*N*<sup>6</sup>-PHB-dAdo  
[M+H] = *m/z* 406.1
